# Supplementary material
Source: ML conference proceedings conference paper supplement (https://openreview.net/forum?id=4R71pdPBZp)
Supplement: supplementary_material [file attachment]

# SELF-EVOLVING MULTI-AGENT COLLABORATION NETWORKS FOR SOFTWARE DEVELOPMENT

Anonymous authors

Paper under double-blind review

## APPENDIX

### 1 BENCHMARK DETAILS

Table 1: Basic statistics for website and game domains, including the amount of samples, prompt length (mean/max), and number of test cases at both Basic and Advanced levels.

| Benchmark | Software |           | Test Case |          |
|-----------|----------|-----------|-----------|----------|
|           | Amount   | Length    | Basic     | Advanced |
| Website   | 45       | 1011/1553 | 292       | 247      |
| Game      | 8        | 507/788   | 46        | 31       |

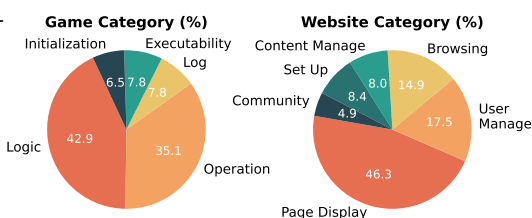

Figure 1: Statistics of Game and Website tasks.

**Step 1: Software requirement generation.** Each task instance begins with the generation of clear, measurable software requirements. Given the inherent differences across various types of software, we adopt distinct approaches for their formulation. For game-related software, we focus on common real-world games, capturing detailed task requirements such as GUI layout initialization, interaction methods, and game rules. To align more closely with actual game development practices, we also include game state logging as part of the software requirements. Due to the complexity of logic in game software, these requirements are manually crafted by human. In contrast, for website-related software, we begin with a concise website name, and then leverage the large language model (`gpt-4o-mini`) to enrich the requirements according to predefined patterns. This approach ensures both efficiency and scalability in the creation of benchmarks for websites. By tailoring the process to the distinct characteristics of each software domain, we maintain precision in requirement formulation while addressing the unique challenges posed by each context.

#### Step 2: Requirement-based test cases generation.

As illustrated in Fig 2 and Fig 3, unit tests offer a precise evaluation of software completion. Each task instance includes black-box unit test cases that correspond directly to the software requirements, allowing for a quantitative assessment of requirement fulfillment. To further assess the model’s code generation capabilities, we categorize test cases into two levels of difficulty—basic and advanced, as outlined in Tab. 1. We also provide an overview of all websites and games in Tab. 2 and Tab. 3 respectively. As shown in Fig. 1, test cases for website and game software exhibit structural differences, reflecting the distinct nature of each software type. They enable more targeted evaluation of code generation capabilities. Thus, similar to software requirements, the test cases are constructed differently based on the software type. For game-related tests, we manually create test cases, akin to the HumanEval Chen et al. (2021) benchmark, which tracks state changes in response to specific inputs. In the game environment, we assess how game states evolve in response to GUI interactions. For website-related tests, large language model (`gpt-4o-mini`) generates Selenium-based test cases aligned with the software requirements, followed by manual corrections to resolve any ambiguities. This structured approach ensures rigorous evaluation across diverse software domains.

**Basic and advanced requirements definition.** For the games, basic requirements involve straightforward user interactions that do not require complex logic, such as character movement or interacting with simple GUI elements. Advanced requirements incorporate more intricate logic, such as managing game state transitions based on user actions or handling conditional game events. These cases focus on ensuring the correct execution of basic actions. In contrast, advanced cases incorporate more intricate logic, such as managing game state transitions based on user actions or handling

Table 2: Overview of Websites in rSDE-Bench.

| Websites                      |                             |                         |
|-------------------------------|-----------------------------|-------------------------|
| CharitableGivingPlatform      | DailyHealthTips             | DailyJournalApp         |
| EcoFriendlyLivingTips         | ElderCareResources          | EventPlanner            |
| FitnessEquipmentRental        | FitnessTracker              | FreelancerMarketplace   |
| GreenLivingGuide              | HealthConsultationPlatform  | MotivationalQuotesApp   |
| MusicFestivalDirectory        | NoteTakingApp               | NutritionInformationHub |
| OnlineLibraryManagementSystem | OnlineTherapeuticJournaling | OnlineThriftStore       |
| PeerTutoringNetwork           | PersonalBlog                | PersonalFinanceBlog     |
| RecipeHub                     | RemoteInternshipMarketplace | RemoteJobBoard          |
| TravelDiary                   | VirtualBookPublishing       | VirtualWellnessRetreats |
| DigitalArtworkGallery         | DigitalStorytellingPlatform | ExpenseTracker          |
| FitnessChallenges             | GardeningForBeginners       | GourmetFoodSubscription |
| MovieRecommendationSystem     | MusicCollaborator           | OnlineCulturalExchange  |
| OnlineCulturalFestivals       | OnlineVintageMarket         | ParentingAdviceForum    |
| PetCareCommunity              | PortfolioSite               | SkillShare              |
| TaskManager                   | VolunteerMatch              | OnlineShoppingCenter    |

Table 3: Overview of Games in rSDE-Bench.

| Games |           |         |         |
|-------|-----------|---------|---------|
| Balls | Tank      | Racing  | Ghostly |
| Mario | Bomberman | Sokoban | Brick   |

#### Software description

Task: Develop a simple Sokoban game. You must design a GUI.

Requirements:

- The game board should be divided into grid squares.
- Players will control the game using the arrow keys on the keyboard.
- As the game starts, a log file named 'game.log' should be created to record the game's progress. The content of the game.log file should be appended with a new entry after each player action. The content of the game.log file should be cleared (if any) at the start of each game session. Each log entry should follow this format:
 

```
{
  "timestamp": timestamp,
  "EVENT_TYPE": "MOVE_RIGHT" | "MOVE_LEFT" | "MOVE_UP" | "MOVE_DOWN" | "INVALID_MOVE",
  "player_position": [x, y],
  "box_positions": [[x1, y1], [x2, y2], ...],
  "game_status": "ONGOING" | "COMPLETE"
}
```
- The victory conditions for the game is: All boxes are pushed onto their corresponding coordinate point.
- The initial positions of each element are required as follows:
 

```
player_position = [1, 1]
box_positions = [[3, 3], [4, 2]]
goal_positions = [[5, 5], [6, 3]]
([3, 3] is the initial position of the first box whose target position is [5, 5]. [4, 2] is the initial position of the second box whose target position is [6, 3].)
wall_positions = [[0, 4], [1, 4], [2, 4],[3, 4],[4, 4]]
(the first number in each pair is the x-coordinate and the second number is the y-coordinate)
```

#### Evaluation functions

```
check_Executability check_log check_move_right check_move_left check_move_box
check_move_wall check_seqbox check_end check_wrong_end
```

Figure 2: Test cases of Game in rSDE-Bench.

conditional game events. These cases challenge the model’s ability to generate code that integrates dynamic decision-making and interaction within the game environment. For websites, basic cases focus on ensuring that the necessary page elements—such as input fields, buttons, and layouts—are present correctly. These cases assess the completeness of the webpage’s structure. On the other hand, advanced cases evaluate more complex functionality, such as handling user authentication, managing dynamic content, or executing specific operations within a content management system. These cases require the model to generate code that performs backend logic and manages user interactions at a deeper level.

```

108
109 Software description
110
111 # Requirement Document for DailyHealthTips Web Application
112
113 ## 1. Objective
114 Develop a web application named 'DailyHealthTips' that provides users with daily health tips, allowing them to receive
115 advice and information about maintaining a healthy lifestyle, using Python as the development language. Note that the
116 website should start from the login page.
117
118 ## 2. Language
119 The required development language for the DailyHealthTips web application is Python.
120
121 ## 3. Page Design
122
123 ### Page 1: Login Page
124 - **Page Title**: User Login
125 - **Overview**: This page allows users to log in to their accounts.
126 - **Elements**:
127   - **Username Field**:
128     - **ID**: `username_field`
129   - **Password Field**:
130     - **ID**: `password_field`
131   - **Login Button**:
132     - **ID**: `login_button`
133
134 .....
135
136 Evaluation functions
137
138 test_login_page_elements test_login_page_functionality test_daily_tips_page_elements
139 test_daily_tips_page_functionality test_tips_archive_page_elements test_tips_archive_page_functionality
140
141
142
143
144
145
146
147
148
149
150
151

```

Figure 3: Test cases of Website in rSDE-Bench.

---

**Algorithm 1** Self-Evolving Paradigm

```

152
153
154
155
156
157
158
159
160
161

```

**Require:**  $\mathbf{X}$  ▷ Task input  
**Require:**  $\mathcal{A}_g^{(0)}$  ▷ Initialized MAC network: agent prompts and pipeline  
**Require:**  $\mathcal{A}_t$  ▷ Designed MAC network to generate target proxy  
**Require:**  $\mathcal{G}$  ▷ Agent-based gradient function  
**Require:**  $\mathcal{U}$  ▷ Agent-based update function  
**Require:**  $E$  ▷ Environment tool to generate loss

- 1: Define  $K$  as the number of self-evolving iterations,  $\Phi$  as MACN generation process
- 2: **# Target Proxy**
- 3:  $\mathbf{T} = \Phi(\mathbf{X}, \mathcal{A}_t)$
- 4: **# Self-Evolving Procedure**
- 5: **for**  $k = 0, 1, \dots, K - 1$  **do**
- 6:   **# Forward Pass**
- 7:    $\mathbf{G}^{(k)} = \Phi(\mathbf{X}, \mathcal{A}_g^{(k)})$
- 8:   **# Loss Computation**
- 9:    $\mathbf{L}^{(k)} = \langle \mathbf{G}^{(k)}, \mathbf{T} \rangle_E$  ▷ Use environment feedback as textual loss
- 10:   **# Textual Backpropagation**
- 11:    $\nabla \mathbf{L}^{(k)} = \mathcal{G}(\mathbf{L}^{(k)}, \mathcal{A}_g^{(k)})$  ▷ Summarize textual gradient
- 12:    $\mathcal{A}_g^{(k+1)} = \mathcal{U}(\mathcal{A}_g^{(k)}, \nabla \mathbf{L}^{(k)})$  ▷ Update agent prompts and pipeline
- 13: **end for**
- 14: **return**  $\mathcal{A}_g^{(K)}, \mathbf{G}^{(K)}$

---

## 2 ALGORITHM

In this section, we present the algorithm of EvoMAC in Alg. 1. For more details, please refer to Section 3.

## 3 CASE STUDY

### 3.1 COMPLETE EVOMAC PROCESS

In this section, we show a complete process of EvoMAC on RSD-Bench. Please refer to Tab. 4.

Table 4: A complete iteration process of EvoMAC on RSD-Bench

| Notation                                        | Meaning                                                                                                                                                                | Example                                                                                                                  | Real example                                                                                                                                             |
|-------------------------------------------------|------------------------------------------------------------------------------------------------------------------------------------------------------------------------|--------------------------------------------------------------------------------------------------------------------------|----------------------------------------------------------------------------------------------------------------------------------------------------------|
| $\mathbf{X}$                                    | Textual description of the task to be completed.                                                                                                                       | A coding task such as: "Implement a code that simulates keyboard input processing via Python."                           | See Tab. 5                                                                                                                                               |
| $\mathcal{A}_g$                                 | MAC network representing the team responsible for generating the code.                                                                                                 | The coding team consists of coding agents completing subtasks in sequence.                                               | See Tab. 6                                                                                                                                               |
| $\mathbf{G} = \Phi(\mathbf{X}, \mathcal{A}_g)$  | Generated output produced by the coding team as a result of the feed-forward pass.                                                                                     | The generated code: <code>'...def process_input(keyboard_input): ...'</code>                                             | See Tab. 7                                                                                                                                               |
| $\mathcal{A}_t$                                 | MAC network representing the team responsible for generating the target proxy (unit tests).                                                                            | The testing team generates unit tests for the task.                                                                      | See Tab. 8                                                                                                                                               |
| $\mathbf{T} = \Phi(\mathbf{X}, \mathcal{A}_t)$  | Target proxy (unit tests) generated by the testing team based on the task description.                                                                                 | Unit tests like: <code>'...def test_press_input(): assert process_input('Enter') == 'Processed Enter'</code>             | See Tab. 9                                                                                                                                               |
| $\langle \mathbf{G}, \mathbf{T} \rangle_E$      | Environmental feedback comparing the generated output $\mathbf{G}$ with the target proxy $\mathbf{T}$ using an objective environment (e.g., compiler or test results). | The environment executes the generated code against the unit tests, providing feedback like: 'Failure: test_press_input' | The execution outcome of the unit test from the terminal. If the execution is successful, the outcome is 'The software run successfully without errors.' |
| $\min \langle \mathbf{G}, \mathbf{T} \rangle_E$ | The optimization objective aiming to minimize the difference between the generated output and the target proxy using the environmental feedback.                       | Based on feedback, the system iteratively refines the coding team to generate code that better meets the task.           | See Tab. 10                                                                                                                                              |

### 3.2 UNIT TEST CASE

In this section, we show more unit test cases written by coder on RSD-Bench, please refer to Tab. 11 and Tab. 14.

### 3.3 UPDATING PROCESS

In this section, we show additional examples of the updating process on RSD-Bench and HumanEval dataset. Please refer to Tab. 17 and Tab. 20 respectively. For RSD-Bench, due to the code length, we only show the texture updating process(codes are available at Sec. 3.1). We can see that the updating agent will adjust the job of each coder dynamically according to the result of test team.

## 4 SOFTWARE PRESENTATION

In this section, we show some games and websites written by EvoMAC. Fig. 4 and Fig. 5 present the games and websites respectively. We see that: i) EvoMAC outputs games with well-written GUI and

Table 5: Textual description of the task to be completed.

Task: Design a Single-Player Tank Battle Game

Requirements:

1. The interface should be divided into a 20x20 grid, though grid lines are not necessary. Each tank occupies one grid space, while obstacles may occupy multiple grid spaces. The background should be black, obstacles should be brown, enemy tanks should be silver, and the player's tank should be yellow.
2. The player can control the tank's movement using the arrow keys on the keyboard, allowing for movement one grid space at a time. The 'enter' key is used to fire bullets.
3. In the game, there are two enemies fixed at a certain position on the game interface, constantly firing bullets in four directions: up, down, left, and right. Two enemies and players cannot be initialized in the same row.
4. Both the player and the enemies have their own health points, which are initialized to 200. When hit by a bullet, the player's health decreases by 10 and the enemy's health decreases by 100. When health points drop to zero, the corresponding tank is destroyed. But the log still records information about the destroyed tank, with health points of 0.
5. Destroying an enemy tank earns the player 200 points. The game ends when the player's tank is destroyed or all enemy tanks are destroyed, at which point the player's score will be displayed on the screen.
6. As the game start, a new log file named 'game.log' should be created to record the game's progress. The first log entry should capture the initial state of the game. Each time a new event occurs to the player, a new log entry should be written in real-time. The logs should follow the format below. The EVENT\_TYPE can only be one of the following: "INIT", "MOVE\_LEFT", "MOVE\_RIGHT", "MOVE\_UP", "MOVE\_DOWN", "FIRE" or "INJURED". The game\_state should capture the current state of the game. In this setup, the position coordinates are defined with the top-left grid as [0, 0], where the x-coordinate increases by one unit for each grid space moved to the right, and the y-coordinate increases by one unit for each grid space moved downward. The player is initialized at position [0,0].

```
{
  "timestamp": timestamp,
  "EVENT_TYPE": "INIT" | "MOVE_LEFT" | "MOVE_RIGHT" | "MOVE_UP"
  | "MOVE_DOWN" | "FIRE" | "INJURED",
  "game_state": {
    "player": {
      "position": [xp, yp],
      "health": health_player,
      "score": score
    },
    "enemies": [
      {
        "position": [xe1, ye1],
        "health": health_enemy1
      },
      {
        "position": [xe2, ye2],
        "health": health_enemy2
      }
    ],
    "obstacle_position": [(x01, y01), ..., (xon, yon)]
  },
}
```

game rules. It can handle different kinds of GUI and game rule requirements from diverse games. ii) EvoMAC outputs websites with beautified, user-friendly web pages and correct transition logic. It can handle the requirements of different websites.

270  
271  
272  
273  
274  
275  
276  
277  
278  
279  
280  
281  
282  
283  
284  
285  
286  
287  
288  
289  
290  
291  
292  
293  
294  
295  
296  
297  
298  
299  
300  
301  
302  
303  
304  
305  
306  
307  
308  
309  
310  
311  
312  
313  
314  
315  
316  
317  
318  
319  
320  
321  
322  
323

Table 6: MAC network representing the team responsible for generating the code.

```
{
  "composition": {
    "Programmer 1": "Implement bullet firing logic that decreases health points for both the player and enemies when hit. This includes creating a function to handle bullet movement and collision detection, updating health points accordingly, and logging the events in the game.log file.",
    "Programmer 2": "Implement health management to check for health points dropping to zero and handle tank destruction. This includes creating a function to check health status after each hit, updating the game state, and logging the destruction event in the game.log file.",
    "Programmer 3": "Implement scoring logic to update the player's score when an enemy tank is destroyed and display the final score when the game ends. This includes creating a function to manage scoring and game-over conditions, and logging the final score in the game.log file."
  },
  "workflow": {
    "Programmer 1": [],
    "Programmer 2": [
      "Programmer 1"
    ],
    "Programmer 3": [
      "Programmer 2"
    ]
  }
}
```

Table 7: **Generated output produced by the coding team as a result of the feed-forward pass. Due to the limit of page length, we only show partial of the codes.**

```

324
325
326
327
328
329
330
331
332
333
334
335
336
337
338
339
340
341
342
343
344
345
346
347
348
349
350
351
352
353
354
355
356
357
358
359
360
361
362
363
364
365
366
367
368
369
370
371
372
373
374
375
376
377
'''
This is the main file for the Single-Player Tank Battle Game.
It initializes the game, sets up the GUI, and manages the game
loop, including player movement, enemy behavior, and logging
events.
'''
import pygame
import json
import time
# Constants
GRID_SIZE = 20
CELL_SIZE = 30
WINDOW_SIZE = GRID_SIZE * CELL_SIZE
PLAYER_COLOR = (255, 255, 0) # Yellow
ENEMY_COLOR = (192, 192, 192) # Silver
OBSTACLE_COLOR = (139, 69, 19) # Brown
BACKGROUND_COLOR = (0, 0, 0) # Black
FPS = 60
# Game state
player_position = [0, 0]
player_health = 200
player_score = 0
enemies = [
    {"position": [5, 5], "health": 200},
    {"position": [10, 10], "health": 200}
]
obstacles = [(3, 3), (7, 7), (12, 12)]
# Log file
log_file = open('game.log', 'w')
initial_state = {
    "timestamp": time.time(),
    "EVENT_TYPE": "INIT",
    "game_state": {
        "player": {
            "position": player_position,
            "health": player_health,
            "score": player_score
        },
        "enemies": enemies,
        "obstacle_position": obstacles
    }
}
log_file.write(json.dumps(initial_state) + '\n')
# Initialize Pygame
pygame.init()
screen = pygame.display.set_mode((WINDOW_SIZE, WINDOW_SIZE))
pygame.display.set_caption("Tank Battle Game")
clock = pygame.time.Clock()
class Bullet:
    '''
    This class represents a bullet fired by the player.
    '''
    def __init__(self, position, direction):
        self.position = position
        self.direction = direction
    def move(self):
        if self.direction == 'UP':
            self.position[1] -= 1
        elif self.direction == 'DOWN':
            self.position[1] += 1
        elif self.direction == 'LEFT':
            self.position[0] -= 1
        elif self.direction == 'RIGHT':
            self.position[0] += 1

```

Table 8: MAC network representing the team responsible for generating the target proxy (unit tests).

```

378
379
380
381
382
383
384
385
386
387
388
389
390
391
392
393
394
395
396
397
398
399
400
401
402
403
404
405
406
407
408
409
410
411
412
413
414
415
416
417
418
419
420
421
422
423
424
425
426
427
428
429
430
431
{
  "composition": {
    "Programmer 1": "Carefully test the logging mechanism
according to the task requirements. Ensure that logs
happen immediately after an action is taken, recording
the most recent state. Verify the logging order, ensuring
basic operations are recorded first, followed by subsequent
events. Check that the data format, keys, and values are
accurate, paying attention to the nested data types and
carefully checking each element.",
    "Programmer 2": "Test the logging mechanism for special
triggered conditions, such as when the player's health drops
to zero or when an enemy tank is destroyed. Ensure that these
events are logged correctly and that the game state reflects
the changes accurately.",
    "Programmer 3": "Test the value initialization required by
the task to ensure they are correctly achieved. Pay attention
to the coordinates of the player and enemies, ensuring they
are initialized in the correct positions and that no two tanks
occupy the same row.",
    "Programmer 4": "Test the function inputs and the global
variables imported in each function. Ensure that the input
values and global variables used in the functions are valid
and involved when the function is called.",
    "Programmer 5": "Test that each event in the task is
implemented correctly and that the logic triggered matches
the conditions described in the task. This includes movement,
firing bullets, and health reduction for both the player
and enemy tanks."
  },
  "workflow": {
    "Programmer 1": [],
    "Programmer 2": [
      "Programmer 1"
    ],
    "Programmer 3": [
      "Programmer 1",
      "Programmer 2"
    ],
    "Programmer 4": [
      "Programmer 1",
      "Programmer 2",
      "Programmer 3"
    ],
    "Programmer 5": [
      "Programmer 1",
      "Programmer 2",
      "Programmer 3",
      "Programmer 4"
    ]
  ]
}

```



Table 9: Target proxy (unit tests) generated by the testing team based on the task description. Due to the limit of page length, we only show one test case written by one of the five test coders.

432  
433  
434  
435  
436  
437  
438  
439  
440  
441  
442  
443  
444  
445  
446  
447  
448  
449  
450  
451  
452  
453  
454  
455  
456  
457  
458  
459  
460  
461  
462  
463  
464  
465  
466  
467  
468  
469  
470  
471  
472  
473  
474  
475  
476  
477  
478  
479  
480  
481  
482  
483  
484  
485

```

import unittest
import json
import time
from main import player_position, player_health, player_score,
enemies, log_file, log_event, fire_bullet, check_health
class TestTankBattleGame(unittest.TestCase):
    def setUp(self):
        global player_position, player_health, player_score, enemies
        player_position = [0, 0]
        player_health = 200
        player_score = 0
        enemies = [
            {"position": [5, 5], "health": 200},
            {"position": [10, 10], "health": 200}
        ]
        log_file = open('game.log', 'w')
    def tearDown(self):
        log_file.close()
    def test_move_left(self):
        global player_position
        player_position[0] = 1 # Move to the right first
        log_event("MOVE_LEFT")
        player_position[0] -= 1
        self.assertEqual(player_position, [0, 0])
    def test_move_right(self):
        global player_position
        log_event("MOVE_RIGHT")
        player_position[0] += 1
        self.assertEqual(player_position, [1, 0])
    def test_move_up(self):
        global player_position
        player_position[1] = 1 # Move down first
        log_event("MOVE_UP")
        player_position[1] -= 1
        self.assertEqual(player_position, [0, 0])
    def test_move_down(self):
        global player_position
        log_event("MOVE_DOWN")
        player_position[1] += 1
        self.assertEqual(player_position, [0, 1])
    def test_fire_bullet_hit_enemy(self):
        global player_score
        initial_health = enemies[0]["health"]
        fire_bullet()
        self.assertEqual(enemies[0]["health"], initial_health - 100)
        self.assertEqual(player_score, 200)
    def test_fire_bullet_miss_enemy(self):
        global player_position
        player_position = [0, 0]
        fire_bullet()
        self.assertEqual(enemies[0]["health"], 200)
    def test_player_injury(self):
        global player_health
        player_health -= 10
        log_event("INJURED")
        check_health()
        self.assertEqual(player_health, 190)
    def test_enemy_destruction(self):
        global enemies
        enemies[0]["health"] = 0
        check_health()
        self.assertEqual(enemies[0]["health"], 0)
if __name__ == '__main__':
    unittest.main()

```

486  
487  
488  
489  
490  
491  
492  
493  
494  
495  
496  
497  
498  
499  
500  
501  
502  
503  
504  
505  
506  
507  
508  
509  
510  
511  
512  
513  
514  
515  
516  
517  
518  
519  
520  
521  
522  
523  
524  
525  
526  
527  
528  
529  
530  
531  
532  
533  
534  
535  
536  
537  
538  
539

Table 10: **The optimization objective aiming to minimize the difference between the generated output and the target proxy using the environmental feedback. According to the unit test results, Updating agent add more notes for the sub-task for Programmer 2 and Programmer 3. To see a complete updating process, please refer to Sec. 3.3**

```
{
  "composition": {
    "Programmer 1": "Implement bullet firing logic that decreases health points for both the player and enemies when hit. This includes creating a function to handle bullet movement and collision detection, updating health points accordingly, and logging the events in the game.log file.",
    "Programmer 2": "Implement health management to check for health points dropping to zero and handle tank destruction. This includes creating a function to check health status after each hit, updating the game state, and logging the destruction event in the game.log file. Additionally, ensure the game loop terminates properly when the player's tank is destroyed.",
    "Programmer 3": "Implement scoring logic to update the player's score when an enemy tank is destroyed and display the final score when the game ends. This includes creating a function to manage scoring and game-over conditions, and logging the final score in the game.log file. Ensure the final score is displayed correctly when the game ends."
  },
  "workflow": {
    "Programmer 1": [],
    "Programmer 2": [
      "Programmer 1"
    ],
    "Programmer 3": [
      "Programmer 2"
    ]
  }
}
```

Table 11: Unit test case: Game

| Example 1                                | Game Ghostly                                                                                                                                   |
|------------------------------------------|------------------------------------------------------------------------------------------------------------------------------------------------|
| Requirement(partial)                     | 3. If the ghost controlled by the player eats a superpellet (the big pellets), it gains the ability to eat other ghosts.                       |
| Subtask given by Test Organizer(partial) | "Programmer 5": "Test that each event in the task is implemented and that the logic triggered matches the conditions in the task description." |
| Generated test case(partial)             | please see Tab. 12                                                                                                                             |
| Evaluation test case(partial)            | please see Tab. 13                                                                                                                             |

540  
541  
542  
543  
544  
545  
546  
547  
548  
549  
550  
551  
552  
553  
554  
555  
556  
557  
558  
559  
560  
561  
562  
563  
564  
565  
566  
567  
568  
569  
570  
571  
572  
573  
574  
575  
576  
577  
578  
579  
580  
581  
582  
583  
584  
585  
586  
587  
588  
589  
590  
591  
592  
593

Table 12: The partial generated test case for Game Ghostly.

```
def test_eat_other_ghost(self):
    main.superpellet_active = True # Activate superpellet
    main.move_ghost("up") # Move to [1, 0]
    # more move_ghost function call omitted here
    with open('game.log', 'r') as log_file:
        logs = log_file.readlines()
        last_log = json.loads(logs[-1])
        self.assertEqual(last_log["event_type"], "eat_other_ghost")
        self.assertEqual(last_log["ghost_position"], [6, 5])
        self.assertNotIn([0, 5], main.other_ghost_positions)
```

Table 13: The partial evaluation test case for Game Ghostly.

```
def check_eat_other(self): # Check if Character can eat others
    with superpellet
        try:
            print("====Test eat other====")
            process = self.start_game()
            time.sleep(0.1)
            pg.press('right', presses=1, interval=0)
            time.sleep(0.1)
            # more press omitted here
            process.terminate()
            print("terminated")
            # Read the log
            logs = self.read_log()
            print(logs)
            cnt=0
            for log in logs:
                if log["event_type"]=="eat_other_ghost":
                    cnt+=1
            if cnt==2:
                print("Character can eat other with superpellet\n\n")
                return 1
            print("Character can eat other with superpellet\n\n")
            return 0
        except:
            print("eat_other error")
            return 0
```

Table 14: Unit test case: Website

| Example 2                                | Website DailyHealthTips                                                                                                                                            |
|------------------------------------------|--------------------------------------------------------------------------------------------------------------------------------------------------------------------|
| Requirement(partial)                     | please see Fig. 3                                                                                                                                                  |
| Subtask given by Test Organizer(partial) | "Programmer 2": "Test whether the first page of the website is the login page and whether it can log in correctly based on the example data provided in the Task." |
| Generated test case(partial)             | please see Tab. 15                                                                                                                                                 |
| Evaluation test case(partial)            | please see Tab. 16                                                                                                                                                 |

594  
595  
596  
597  
598  
599  
600  
601  
602  
603  
604  
605  
606  
607  
608  
609  
610  
611  
612  
613  
614  
615  
616  
617  
618  
619  
620  
621  
622  
623  
624  
625  
626  
627  
628  
629  
630  
631  
632  
633  
634  
635  
636  
637  
638  
639  
640  
641  
642  
643  
644  
645  
646  
647

Table 15: The partial generated test case for Website DailyHealthTips.

```
'''
Test whether the first page of the website is the login page and
whether it can log in correctly based on the example data
provided in the Task.
'''
import unittest
from selenium import webdriver
from selenium.webdriver.common.by import By
from selenium.webdriver.common.keys import Keys
import time
class TestDailyHealthTipsLogin(unittest.TestCase):
    def setUp(self):
        self.driver = webdriver.Chrome()
        self.driver.get("http://localhost:5000")
    def test_login_page(self):
        driver = self.driver
        # Check if the current page is the login page
        self.assertIn("User Login", driver.title)
        print("Login page title is correct.")
        # Locate username and password fields
        username_field = driver.find_element(By.ID, "username_field")
        password_field = driver.find_element(By.ID, "password_field")
        login_button = driver.find_element(By.ID, "login_button")
        # Input example data
        username_field.send_keys("john_doe")
        password_field.send_keys("securepassword")
        login_button.click()
        # Wait for the page to load
        time.sleep(2)
        # Check if redirected to Daily Health Tips page
        self.assertIn("Daily Health Tips", driver.title)
        print("Successfully logged in and redirected to
        Daily Health Tips page.")
    def tearDown(self):
        self.driver.quit()
if __name__ == "__main__":
    unittest.main()
```

Table 16: The partial evaluation test case for Website DailyHealthTips.

648  
649  
650  
651  
652  
653  
654  
655  
656  
657  
658  
659  
660  
661  
662  
663  
664  
665  
666  
667  
668  
669  
670  
671  
672  
673  
674  
675  
676  
677  
678  
679  
680  
681  
682  
683  
684  
685  
686  
687  
688  
689  
690  
691  
692  
693  
694  
695  
696  
697  
698  
699  
700  
701

```

class TestCase(unittest.TestCase):
    def setUp(self):
        """Set up the Selenium WebDriver before each test."""
        self.driver = webdriver.Chrome()
        self.driver.get("http://localhost:5000")

    def tearDown(self):
        """Tear down the WebDriver after each test."""
        self.driver.quit()

    def login(self):
        self.driver.delete_all_cookies()
        username = "john_doe"
        password = "securepassword"
        # Performing login
        self.driver.get("http://localhost:5000")
        self.driver.find_element(By.ID, "username_field")
            .send_keys(username)
        self.driver.find_element(By.ID, "password_field")
            .send_keys(password)
        self.driver.find_element(By.ID, "login_button").click()

    # ===== Login Page Tests =====
    def test_login_page_elements(self):
        # Go back to the login page and check elements
        self.assertTrue(self.driver.find_element
            (By.ID, 'username_field').is_displayed())
        self.assertTrue(self.driver.find_element
            (By.ID, 'password_field').is_displayed())
        self.assertTrue(self.driver.find_element
            (By.ID, 'login_button').is_displayed())

    def test_login_page_functionality(self):
        # Assume user login is verified by the presence
        of daily tips page elements
        self.assertIn("User Login", self.driver.title)
        username = "john_doe"
        password = "securepassword"
        self.driver.find_element(By.ID, 'username_field')
            .send_keys(username)
        self.driver.find_element(By.ID, 'password_field')
            .send_keys(password)
        self.driver.find_element(By.ID, 'login_button').click()

        # Check if we are redirected to the daily tips page
        self.assertIn("Daily Health Tips", self.driver.title)
    # more test case omitted

```

Table 17: Updating process on RSD-Bench

| RSD-Bench Game Tank                 | Example            |
|-------------------------------------|--------------------|
| Requirement(partial)                | please see Tab. 5  |
| Initial Code Organizer(iteration 0) | please see Tab. 6  |
| Updating agent(iteration 1)         | please see Tab. 10 |
| Updating agent(iteration 2)         | please see Tab. 18 |
| Updating agent(iteration 3)         | please see Tab. 19 |

702  
703  
704  
705  
706  
707  
708  
709  
710  
711  
712  
713  
714  
715  
716  
717  
718  
719  
720  
721  
722  
723  
724  
725  
726  
727  
728  
729  
730  
731  
732  
733  
734  
735  
736  
737  
738  
739  
740  
741  
742  
743  
744  
745  
746  
747  
748  
749  
750  
751  
752  
753  
754  
755

**Table 18: Updating process on RSD-Bench Game Tank, iteration 2**

```
{
  "composition": {
    "Programmer 1": "Fix the health management logic to ensure
that when the player's health drops to zero, the destruction
event is logged correctly, and the game loop terminates
properly. This includes modifying the `check_health` function
to accurately log destruction events for both the player and
enemies.",
    "Programmer 2": "Implement the game-over conditions to ensure
that the game ends when the player's tank is destroyed or all
enemy tanks are destroyed. This includes creating a function
to manage the game-over state and logging the final score
in the game.log file."
  },
  "workflow": {
    "Programmer 1": [],
    "Programmer 2": [
      "Programmer 1"
    ]
  }
}
```

**Table 19: Updating process on RSD-Bench Game Tank, iteration 3**

```
{
  "composition": {
    "Programmer 1": "Implement constant firing behavior for enemy
tanks in four directions. This includes creating a mechanism
for enemies to fire bullets at the player and logging the
corresponding events.",
    "Programmer 2": "Implement the display of the player's score
at the end of the game when the game is over. This includes
modifying the game-over logic to ensure the final score is
logged and displayed correctly.",
    "Programmer 3": "Fix the logging mechanism to ensure that
the log file remains open during gameplay and logs events
in real-time without closing prematurely. This includes
reviewing the log_event function and ensuring it is called
correctly throughout the game loop."
  },
  "workflow": {
    "Programmer 1": [],
    "Programmer 2": [
      "Programmer 1"
    ],
    "Programmer 3": [
      "Programmer 1",
      "Programmer 2"
    ]
  }
}
```

756  
757  
758  
759  
760  
761  
762  
763  
764  
765  
766  
767  
768  
769  
770  
771  
772  
773  
774  
775  
776  
777  
778  
779  
780  
781  
782  
783  
784  
785  
786  
787  
788  
789  
790  
791  
792  
793  
794  
795  
796  
797  
798  
799  
800  
801  
802  
803  
804  
805  
806  
807  
808  
809

Table 20: Updating process on HumanEval

| HumanEval                           | Example                                                                                                                                                                                                                                        |
|-------------------------------------|------------------------------------------------------------------------------------------------------------------------------------------------------------------------------------------------------------------------------------------------|
| Requirement                         | Write a function that takes a message, and encodes in such a way that it swaps case of all letters, replaces all vowels in the message with the letter that appears 2 places ahead of that vowel in the english alphabet. Assume only letters. |
| Initial Code Organizer(iteration 0) | "Programmer 1": "Identify and implement the logic to swap the case of all letters in the message.", "Programmer 2": "Implement the logic to replace all vowels with the letter that appears 2 places ahead in the English alphabet."           |
| Generated test case(iteration 0)    | please see Tab. 21                                                                                                                                                                                                                             |
| Main code(iteration 0)              | please see Tab. 22                                                                                                                                                                                                                             |
| Updating agent(iteration 1)         | "Programmer 1": AssertionError: encode('test') != 'TGST'. The actual output is: 'TgST'., "Programmer 2": AssertionError: encode('This is a message') != 'tHKS KS C MGSSCGG'. The actual output is: 'tHkS kS c MgSScGg'.                        |
| Final code(iteration 1)             | please see Tab. 23                                                                                                                                                                                                                             |

Table 21: Updating process on HumanEval, Generated test case. iteration 0

```

'''
Write a simple test case to verify the logic of the encode function.
'''
import unittest
from encode_function import encode
class TestEncodeFunction(unittest.TestCase):
    def test_example_case_1(self):
        self.assertEqual(encode('test'), 'TGST')
    def test_example_case_2(self):
        self.assertEqual(encode('This is a message'),
            'tHKS KS C MGSSCGG')
if __name__ == '__main__':
    unittest.main()

```

810  
811  
812  
813  
814  
815  
816  
817  
818  
819  
820  
821  
822  
823  
824  
825  
826  
827  
828  
829  
830  
831  
832  
833  
834

Table 22: Updating process on HumanEval, Main code, iteration 0

```
'''
def encode(message):
    vowels = 'aeiouAEIOU'
    encoded_message = []
    for char in message:
        if char.isalpha():
            # Swap case
            if char in vowels:
                # Replace vowel with the letter 2 places ahead
                if char.islower():
                    new_char = chr(((ord(char) - ord('a') + 2) % 26)
                                   + ord('a'))
                else:
                    new_char = chr(((ord(char) - ord('A') + 2) % 26)
                                   + ord('A'))
                encoded_message.append(new_char)
            else:
                # Just swap case for consonants
                encoded_message.append(char.swapcase())
        else:
            # If it's not a letter, we can just append it as is
            encoded_message.append(char)
    return ''.join(encoded_message)
```

835  
836  
837  
838

Table 23: Updating process on HumanEval, Final code, iteration 1

839  
840  
841  
842  
843  
844  
845  
846  
847  
848  
849  
850  
851  
852  
853  
854  
855  
856  
857  
858  
859  
860  
861  
862  
863

```
'''
def encode(message):
    vowels = 'aeiouAEIOU'
    encoded_message = []
    for char in message:
        if char.isalpha():
            # Swap case
            if char in vowels:
                # Replace vowel with the letter 2 places ahead
                # and swap case
                if char.islower():
                    new_char = chr(((ord(char) - ord('a') + 2) % 26)
                                   + ord('a')).upper()
                else:
                    new_char = chr(((ord(char) - ord('A') + 2) % 26)
                                   + ord('A')).lower()
                encoded_message.append(new_char)
            else:
                # Just swap case for consonants
                encoded_message.append(char.swapcase())
        else:
            # Preserve spaces
            encoded_message.append(char)
    return ''.join(encoded_message)
```



864  
865  
866  
867  
868  
869  
870  
871  
872  
873  
874  
875  
876  
877  
878  
879  
880  
881  
882  
883  
884  
885  
886  
887  
888  
889  
890  
891  
892  
893  
894  
895  
896  
897  
898  
899  
900  
901  
902  
903  
904  
905  
906  
907  
908  
909  
910  
911  
912  
913  
914  
915  
916  
917

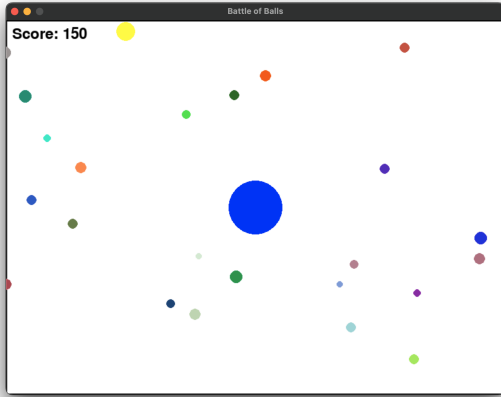

(a) Balls

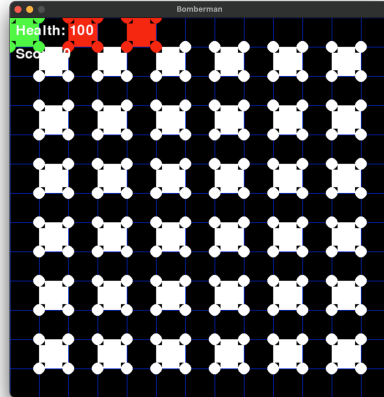

(b) Bomberman

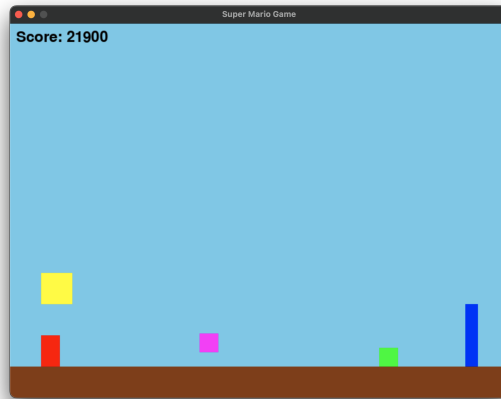

(c) Mario

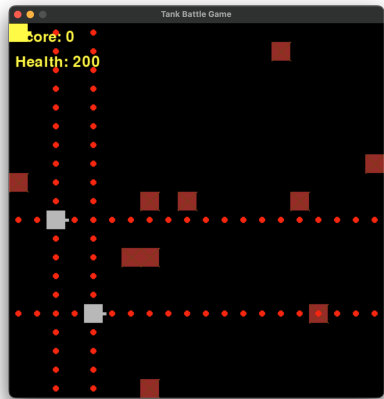

(d) Tank

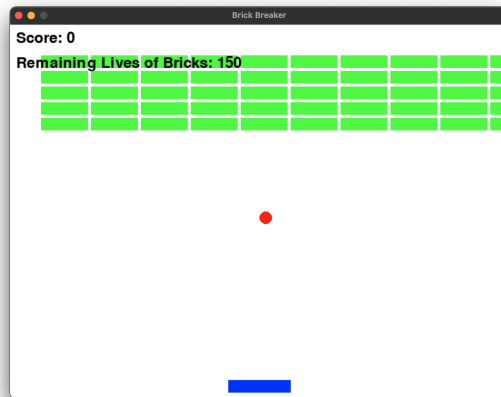

(e) Brick

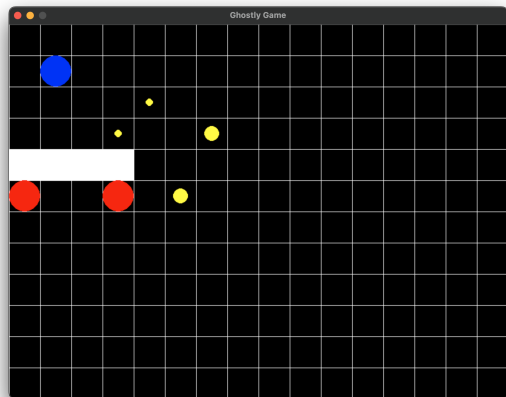

(f) Ghostly

918  
919  
920  
921  
922  
923  
924  
925  
926  
927  
928  
929  
930  
931  
932  
933  
934  
935  
936  
937  
938  
939  
940  
941  
942  
943  
944  
945  
946  
947  
948  
949  
950  
951  
952  
953  
954  
955  
956  
957  
958  
959  
960  
961  
962  
963  
964  
965  
966  
967  
968  
969  
970  
971

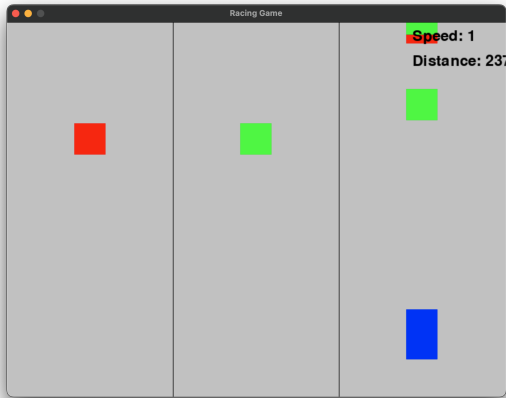

(g) Racing

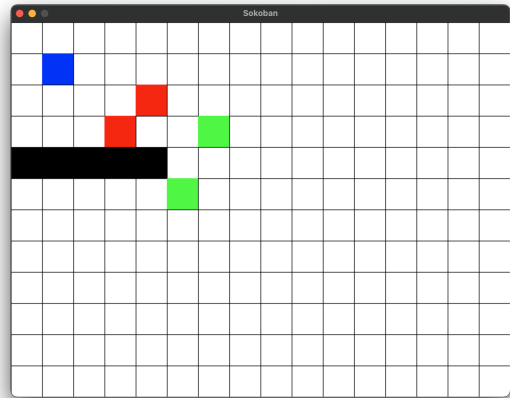

(h) Sokoban

Figure 4: Games generated by EvoMAC.

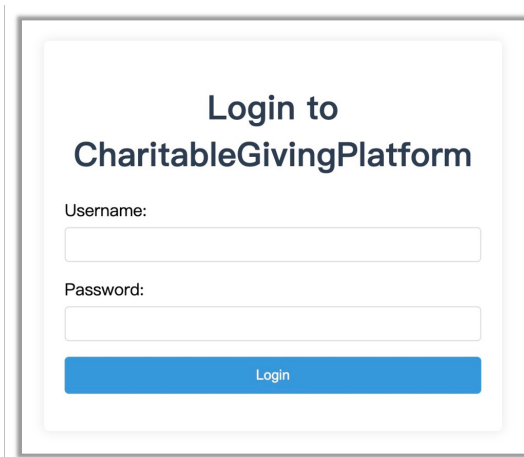

(a) CharitableGivingPlatform

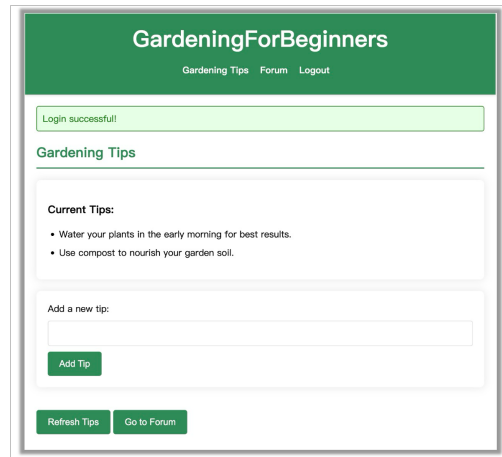

(b) GardeningForBeginners

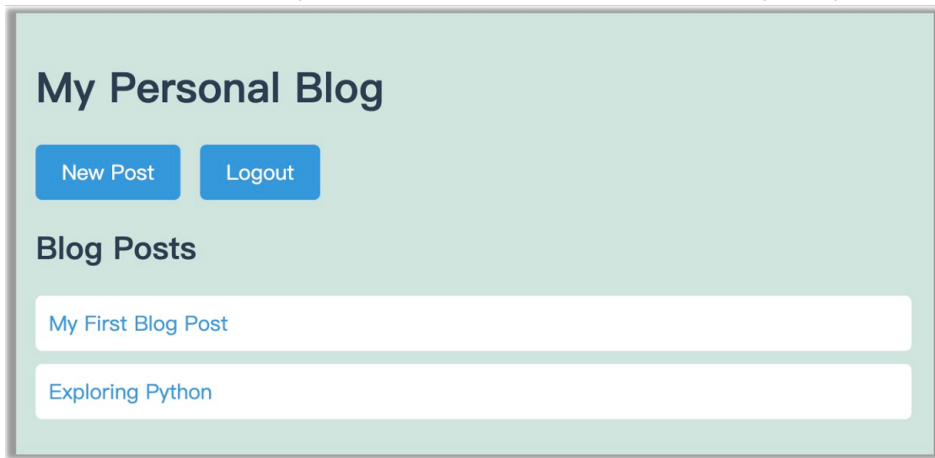

(c) PersonalBlog

972  
973  
974  
975  
976  
977  
978  
979  
980  
981  
982  
983  
984  
985  
986  
987  
988  
989  
990  
991  
992  
993  
994  
995  
996  
997  
998  
999  
1000  
1001  
1002  
1003  
1004  
1005  
1006  
1007  
1008  
1009  
1010  
1011  
1012  
1013  
1014  
1015  
1016  
1017  
1018  
1019  
1020  
1021  
1022  
1023  
1024  
1025

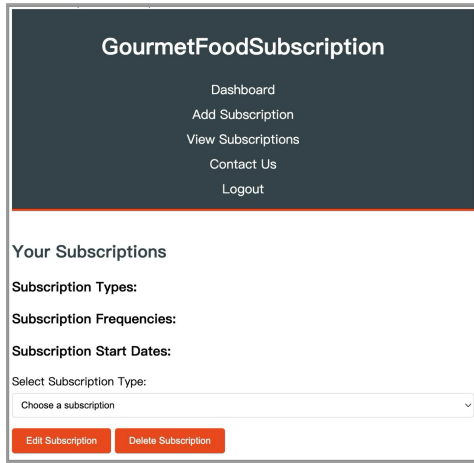

(d) GourmetFoodSubscription

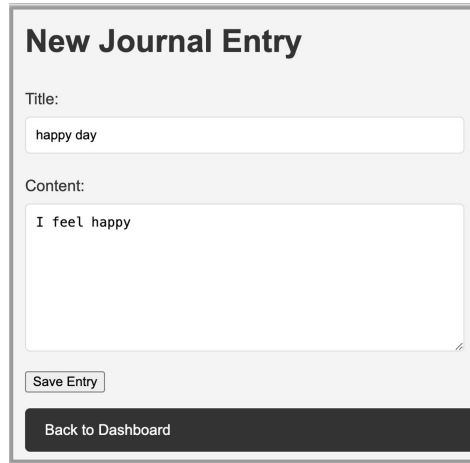

(e) OnlineTherapeuticJournaling

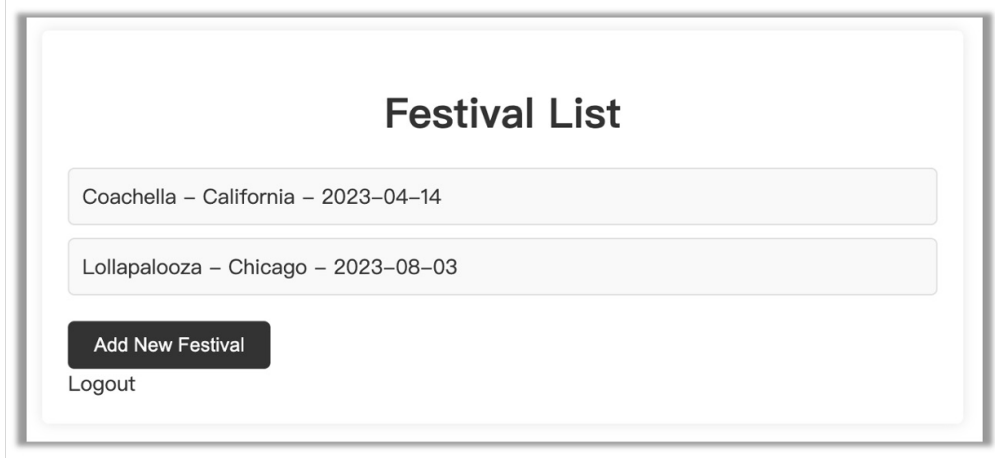

(f) MusicFestivalDirectory

Figure 5: Websites generated by EvoMAC.

1026  
1027  
1028  
1029  
1030  
1031  
1032  
1033  
1034  
1035  
1036  
1037  
1038  
1039  
1040  
1041  
1042  
1043  
1044  
1045  
1046  
1047  
1048  
1049  
1050  
1051  
1052  
1053  
1054  
1055  
1056  
1057  
1058  
1059  
1060  
1061  
1062  
1063  
1064  
1065  
1066  
1067  
1068  
1069  
1070  
1071  
1072  
1073  
1074  
1075  
1076  
1077  
1078  
1079

REFERENCES

Mark Chen, Jerry Tworek, Heewoo Jun, Qiming Yuan, Henrique Ponde de Oliveira Pinto, Jared Kaplan, Harri Edwards, Yuri Burda, Nicholas Joseph, Greg Brockman, Alex Ray, Raul Puri, Gretchen Krueger, Michael Petrov, Heidy Khlaaf, Girish Sastry, Pamela Mishkin, Brooke Chan, Scott Gray, Nick Ryder, Mikhail Pavlov, Alethea Power, Lukasz Kaiser, Mohammad Bavarian, Clemens Winter, Philippe Tillet, Felipe Petroski Such, Dave Cummings, Matthias Plappert, Fotios Chantzis, Elizabeth Barnes, Ariel Herbert-Voss, William Hebgen Guss, Alex Nichol, Alex Paino, Nikolas Tezak, Jie Tang, Igor Babuschkin, Suchir Balaji, Shantanu Jain, William Saunders, Christopher Hesse, Andrew N. Carr, Jan Leike, Josh Achiam, Vedant Misra, Evan Morikawa, Alec Radford, Matthew Knight, Miles Brundage, Mira Murati, Katie Mayer, Peter Welinder, Bob McGrew, Dario Amodei, Sam McCandlish, Ilya Sutskever, and Wojciech Zaremba. Evaluating large language models trained on code. 2021.
